# Supplementary material for: Extracellular matrix scaffold and hydrogel derived from decellularized and delipidized human pancreas
Source: PubMed Central journal article supplement (PMC6041318; doi:10.1038/s41598-018-28857-1), 2018-07-11
Supplement: 41598_2018_28857_MOESM1_ESM.pdf [file 41598_2018_28857_MOESM1_ESM.pdf]

## Supplementary Information

### **Extracellular matrix scaffold and hydrogel derived from decellularized and delipidized human pancreas**

Sara Dutton Sackett\*<sup>#1</sup>, Daniel M. Tremmel<sup>#1</sup>, Fengfei Ma<sup>2</sup>, Austin K. Feeney<sup>1</sup>, Rachel M. Maguire<sup>1</sup>, Matthew E. Brown<sup>1</sup>, Ying Zhou<sup>1</sup>, Xiang Li<sup>1</sup>, Cori O'Brien<sup>1</sup>, Lingjun Li<sup>2,3</sup>, William J. Burlingham<sup>1</sup> and Jon S. Odorico<sup>1</sup>

# Sara Dutton Sackett and Daniel M. Tremmel contributed equally in this article

<sup>1</sup>Division of Transplantation, Department of Surgery, University of Wisconsin-Madison School of Medicine and Public Health, Madison, Wisconsin, USA

<sup>2</sup>School of Pharmacy, University of Wisconsin, Madison, Wisconsin, USA

<sup>3</sup>Department of Chemistry, University of Wisconsin, Madison, Wisconsin, USA

| ID | Sex    | Patient Age | Weight (kg) | Height (cm) | BMI   | Donor Type             | Blood Type | DCD/DBD | CIT (hours) | HbA1c (4.3-6.5) | Lipase (75-390) | Amylase (20-100) |
|----|--------|-------------|-------------|-------------|-------|------------------------|------------|---------|-------------|-----------------|-----------------|------------------|
| 8  | Male   | 13 years    | 100         | 177.8       | 31.63 | Head Trauma            | O          | DCD     | 7           | 5.9             | 196             | 190              |
| 10 | Female | 53 years    | 102         | 170.18      | 35.22 | Anoxia                 | A          | DCD     | 6           | nd              | 153             | 35               |
| 11 | Male   | 57 years    | 81.8        | 177.8       | 25.88 | Cerebrovascular/Stroke | O          | DBD     | 3           | 5.7             | 13              | 37               |
| 12 | Male   | 27 years    | 30          | 121.92      | 20.18 | Other Specify          | O          | DCD     | 20.5        | 5.8             | 15              | 100              |
| 13 | Male   | 39 years    | 97.7        | 170.18      | 33.73 | Cerebrovascular/Stroke | O          | DBD     | 15.5        | nd              | 390             | 71               |
| 14 | Male   | 55 years    | 86          | 177.8       | 27.2  | Head Trauma            | A          | DBD     | 8           | 4.8             | 12              | 40               |
| 15 | Male   | 31 years    | 95          | 182.88      | 28.4  | Head Trauma            | A          | DBD     | 9           | 5               | 22              | 43               |
| 16 | Male   | 53 years    | 80          | 172.72      | 26.82 | Anoxia                 | A          | DBD     | 19          | nd              | 14              | 316              |
| 23 | Male   | 58 years    | 81.7        | 172.72      | 27.39 | Cerebrovascular/Stroke | A          | DBD     | 6.5         | nd              | 19              | 35               |
| 27 | Female | 45 years    | 92.8        | 172.72      | 31.11 | Cerebrovascular/Stroke | A          | DBD     | 13.5        | nd              | 9               | 55               |
| 35 | Female | 48 years    | 53          | 160.02      | 20.7  | Head Trauma            | O          | DBD     | 5           | 5.4             | 19              | 31               |

**Table S1: Characteristics of human cadaver donors providing pancreata for decellularization.**

Abbreviations: donor after cardiac death (DCD); donor after brain death (DBD); cold ischemic time (CIT); hemoglobin a1C (HbA1c); Body mass index (BMI).

| Antibody               | Product Number    | Dilution | Manufacturer             |
|------------------------|-------------------|----------|--------------------------|
| Mouse anti-Collagen I  | ab88147           | 1:250    | Abcam                    |
| Rabbit anti-Pdx1       | ab134150          | 1:1000   | Abcam                    |
| Mouse anti-Insulin     | I2018             | 1:10000  | Sigma-Aldrich            |
| Rabbit anti-Glucagon   | ab92517           | 1:2000   | Abcam                    |
| Rabbit anti-Ki67       | ab16667 clone SP6 | 1:500    | Abcam                    |
| Rabbit anti-Caspase3   | 9662              | 1:500    | Cell Signalling          |
| Mouse anti-Collagen IV | ab6586            | 1:1000   | Abcam                    |
| Rabbit anti-Laminin    | L9393             | 1:200    | Sigma-Aldrich            |
| Mouse anti-HLA ABC     | ab70328           | 1:100    | Abcam                    |
| Mouse anti-HLA DR      | ab80658           | 1:1000   | Abcam                    |
| Mouse anti-Nkx6.1      | F55A12-s          | 1:100    | DSHB                     |
| Rabbit anti-vWF        | A008202-5         | 1:500    | Dako                     |
| Mouse anti-VE Cadherin | sc-9989           | 1:100    | Santa Cruz Biotechnology |
| Anti-human CD3         | ab134093          | 1:500    | Abcam                    |
| Anti-human CD8         | ab108343          | 1:100    | Abcam                    |
| Anti-human CD20        | 555677            | 1:500    | BD Pharmingen            |
| Anti-human CD45        | 555491            | 1:20     | BD Pharmingen            |
| Anti-human CD68        | M0814             | 1:1000   | Dako                     |
| Anti-mouse CD68        | ab31630           | 1:100    | Abcam                    |
| Anti-human FoxP3       | ab10563           | 1:300    | Abcam                    |

**Table S2: Antibodies for immunocytochemistry and immunohistochemistry.**

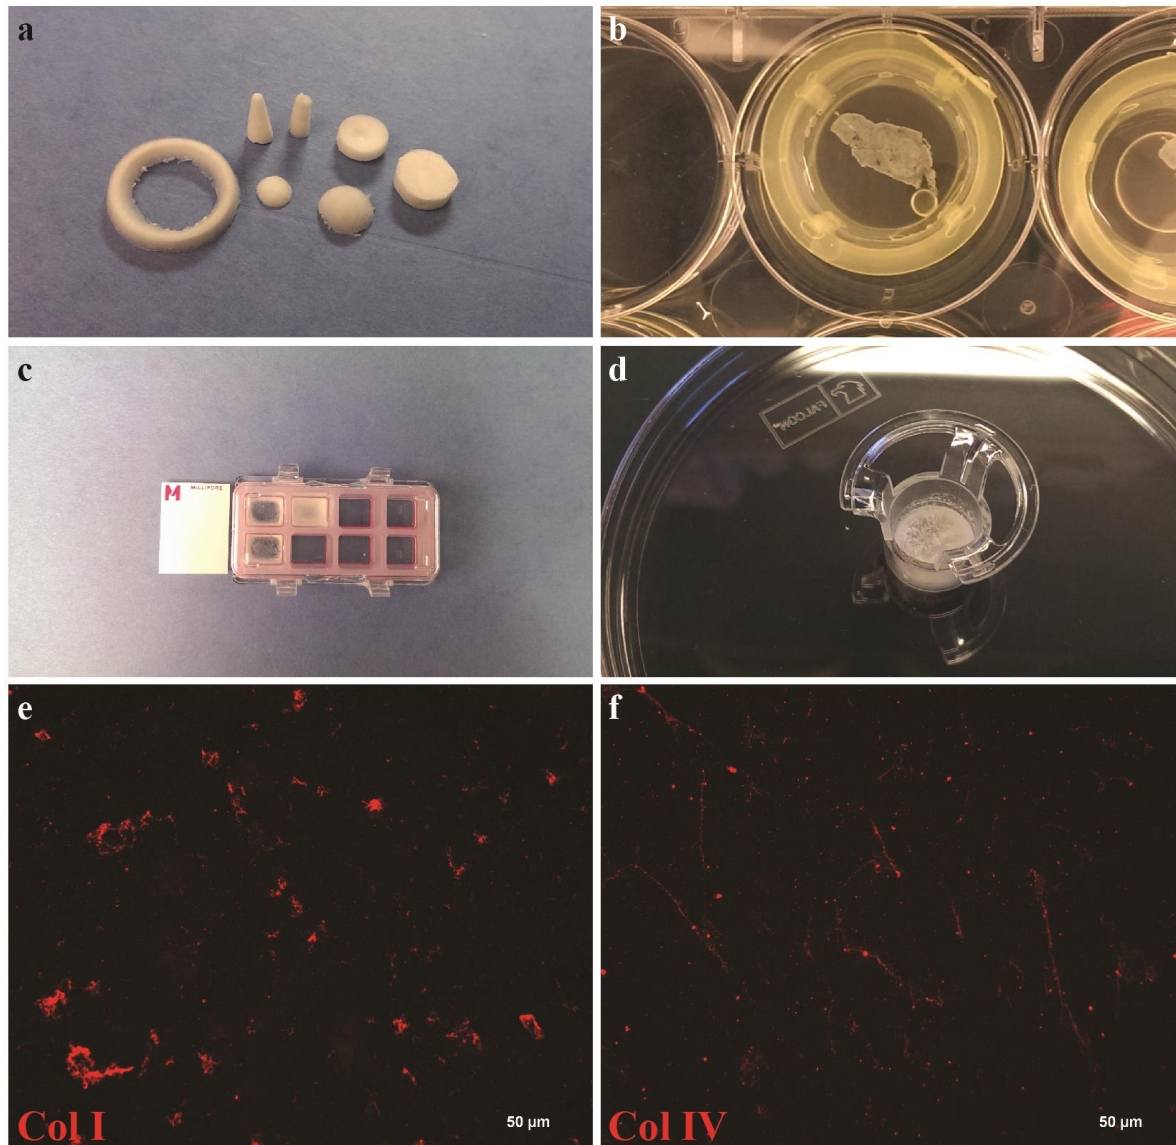

**Fig. S1:** Applications for decellularized pancreas ECM. hP-ECM and hP-HG are able to be manipulated to produce several types of acellular natural matrix constructs, including intact 3D matrix (a), cut in thin slices (b), placed in tissue culture vessels such as chamber slides (c) Transwells (d) and applied in thin coatings to tissue culture plate show in e and f stained with collagen I and IV.

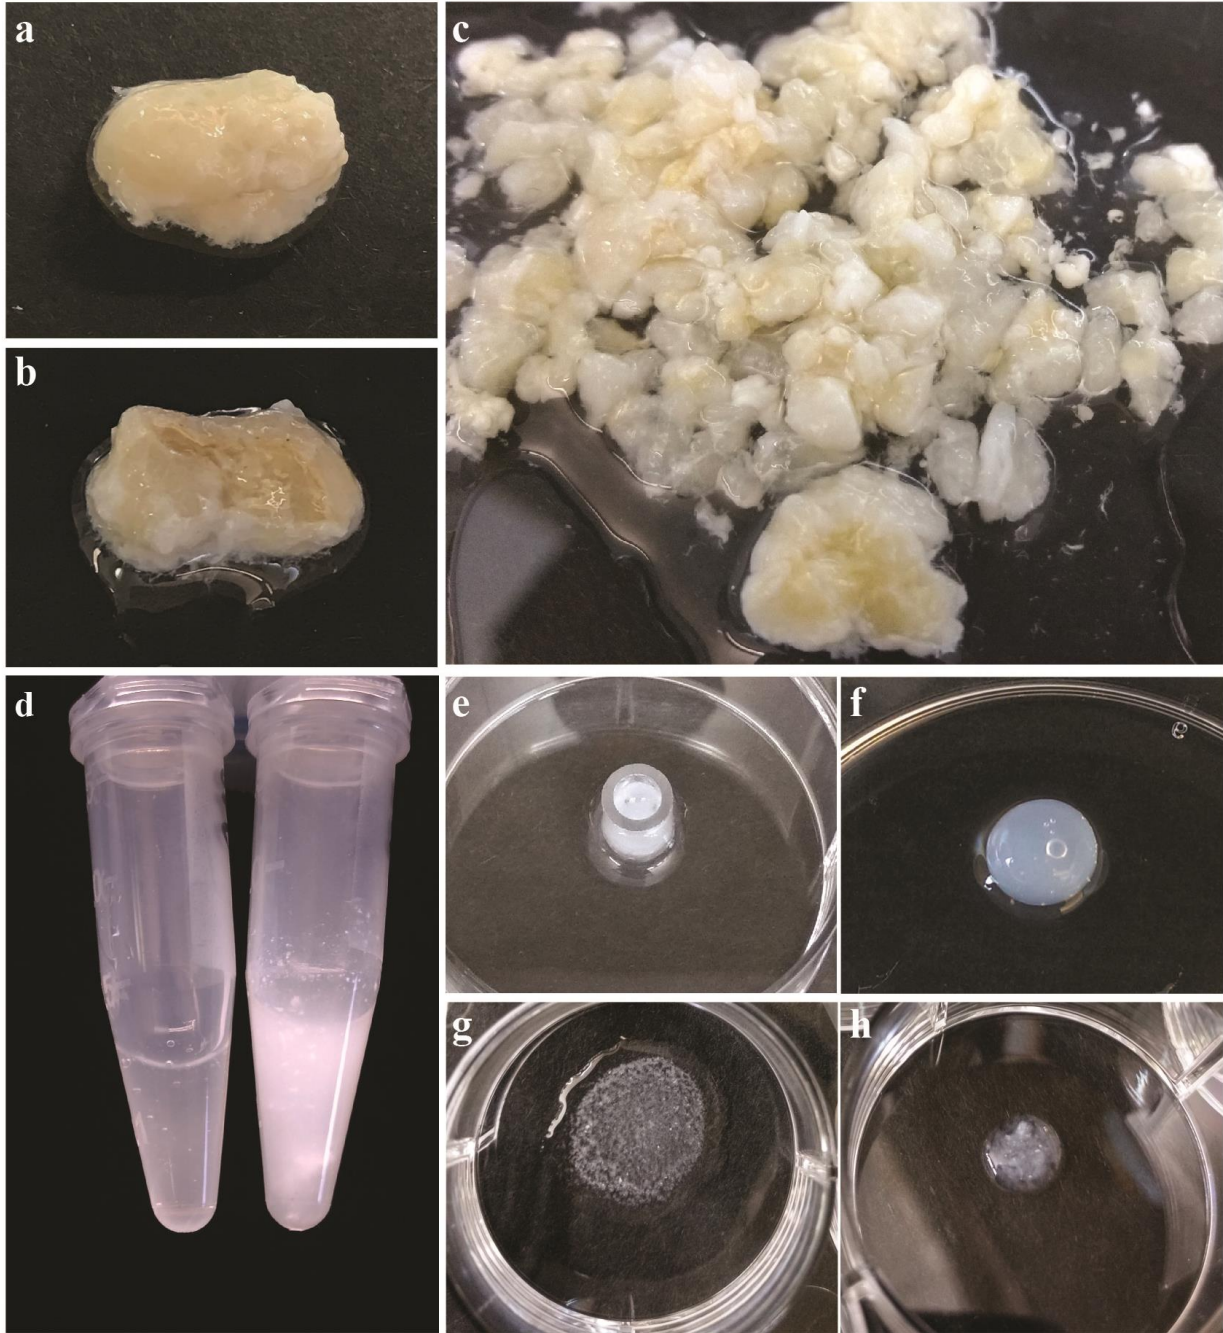

**Fig. S2:** High fat content inhibits solubilization and gelation. **a)** Cube of spin-decellularized pancreas, **b)** bisected to reveal a yellow interior with higher fat content. **c)** Several cut up pieces with yellow interiors. Following pepsin digestion, the pre-gel solution is cloudier following spin-decell (**d**, right) compared to homogenized decell (**d**, left). When neutralized and gelled in a mold (**e**) the homogenized-decell consistently yields a sturdy gel (**f**) while the spin-decell results in no gelation (**g**) or incomplete gelation (**h**) - depending on the initial fat content of the donor organ.

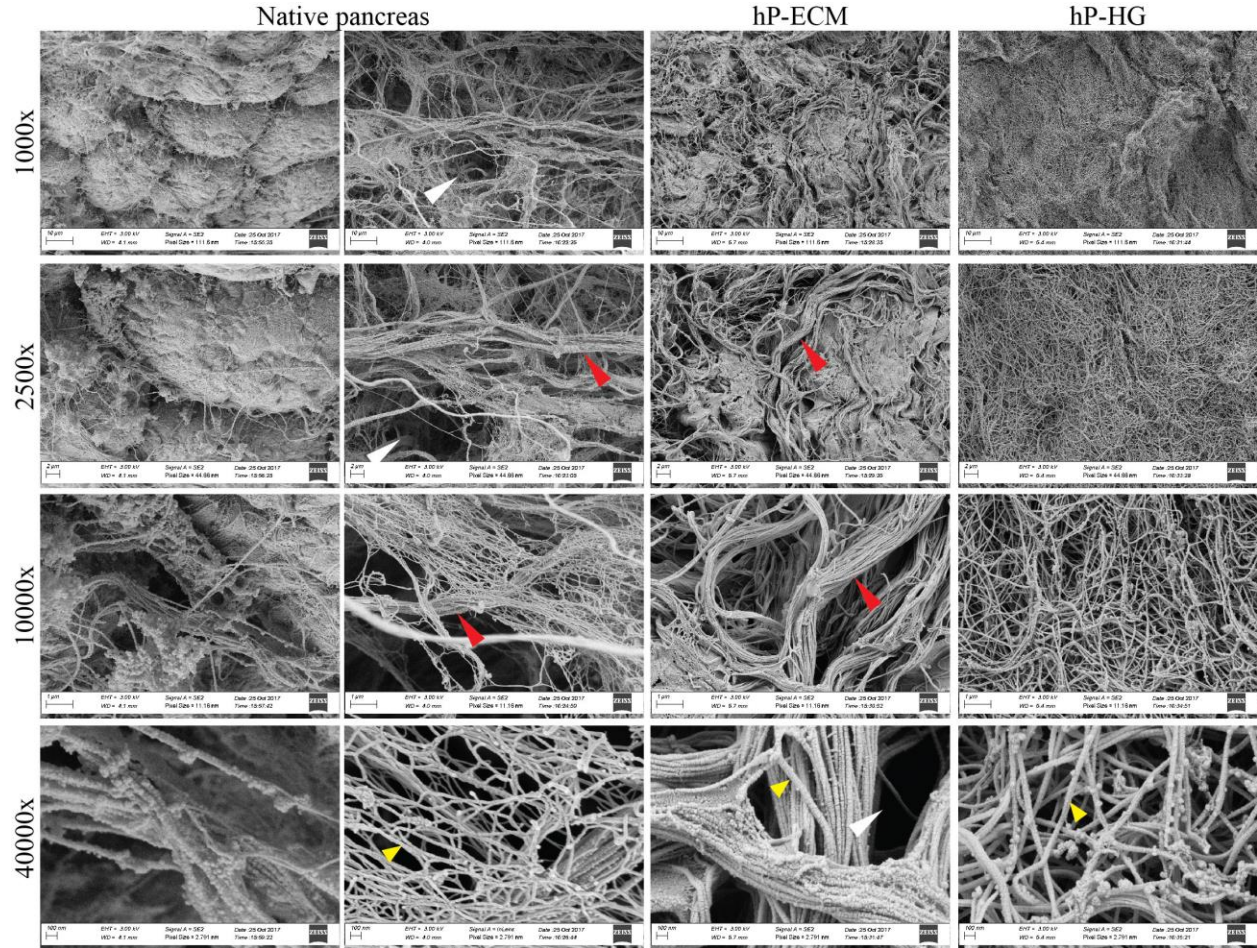

**Fig S3:** Organisation of native pancreas and decellularized hP-ECM and hP-HG by SEM. Native pancreas demonstrating cells organized in dense clusters and covered by connective tissues of high and low densities. Long white arrows indicate empty space within the ECM, potentially suitable for cell occupation. Long red arrows indicate collagen fibril bundle structures, retained within the hP-ECM. Short yellow arrows indicate collagen fibrils, present in the native tissue, the hP-ECM as well as the hP-HG.

| Protein Group     | Type      | Gene                                          | Name                                      | Intensity            | Protein Group           | Type              | Gene                               | Name                                                           | Intensity |
|-------------------|-----------|-----------------------------------------------|-------------------------------------------|----------------------|-------------------------|-------------------|------------------------------------|----------------------------------------------------------------|-----------|
| Core matrisome    | Collagens | COL1A2                                        | Collagen Type 1 Alpha 1 Chain             | 1.97E+09             | Core matrisome          | ECM Glycoproteins | NPNT                               | Nephronectin                                                   | 3.68E+04  |
| Core matrisome    | Collagens | COL1A1                                        | Collagen Type 1 Alpha 2 Chain             | 5.17E+09             | Core matrisome          | ECM Glycoproteins | FBLN1                              | Fibulin 1                                                      | 2.75E+04  |
| Core matrisome    | Collagens | COL5A2                                        | Collagen Type 5 Alpha 2 Chain             | 1.53E+08             | Core matrisome          | ECM Glycoproteins | IGFBP2                             | Insulin Like Growth Factor Binding Protein 2                   | 2.38E+04  |
| Core matrisome    | Collagens | COL5A1                                        | Collagen Type 5 Alpha 1 Chain             | 1.24E+08             | Core matrisome          | ECM Glycoproteins | LTDPI                              | Latent Transforming Growth Factor Beta Binding Protein         | 1.02E+05  |
| Core matrisome    | Collagens | COL3A1                                        | Collagen Type 3 Alpha 1 Chain Isoform 1   | 1.42E+09             | Core matrisome          | Proteoglycans     | HSPG2                              | Heparan                                                        | 6.59E+06  |
| Core matrisome    | Collagens | COL3A1                                        | Collagen Type 3 Alpha 1 Chain Isoform 2   | 4.00E+06             | Core matrisome          | Proteoglycans     | BGN                                | Biglycan                                                       | 1.06E+07  |
| Core matrisome    | Collagens | COL6A1                                        | Collagen Type 6 Alpha 1 Chain             | 6.32E+07             | Core matrisome          | Proteoglycans     | PREL1                              | Prelamin                                                       | 6.93E+06  |
| Core matrisome    | Collagens | COL6A3                                        | Collagen Type 6 Alpha 3 Chain             | 7.46E+07             | Core matrisome          | Proteoglycans     | DCN                                | Decorin                                                        | 1.16E+07  |
| Core matrisome    | Collagens | COL6A2                                        | Collagen Type 6 Alpha 2 Chain Isoform 2C2 | 1.83E+06             | Core matrisome          | Proteoglycans     | ASPN                               | Asporin                                                        | 4.94E+06  |
| Core matrisome    | Collagens | COL6A2                                        | Collagen Type 6 Alpha 2 Chain Isoform 2CA | 6.23E+04             | Core matrisome          | Proteoglycans     | LUM                                | Lumican                                                        | 2.76E+06  |
| Core matrisome    | Collagens | COL2A2                                        | Collagen Type 2 Alpha 2 Chain             | 6.38E+07             | Core matrisome          | Proteoglycans     | OGN                                | Osteoglycin                                                    | 7.76E+05  |
| Core matrisome    | Collagens | COL14A1                                       | Collagen Type 14 Alpha 1 Chain            | 2.81E+06             | Core matrisome          | Proteoglycans     | FMOD                               | Fibromodulin                                                   | 3.16E+04  |
| Core matrisome    | Collagens | COL5A3                                        | Collagen Type 5 Alpha 3 Chain             | 3.99E+07             | Matrisome-associated    | ECM Regulators    | PRSS1                              | Protease, Serine 1                                             | 1.14E+06  |
| Core matrisome    | Collagens | COL2A1                                        | Collagen Type 2 Alpha 1 Chain             | 2.81E+07             | Matrisome-associated    | ECM Regulators    | PRSS3                              | Protease, Serine 3                                             | 6.74E+05  |
| Core matrisome    | Collagens | COL16A1                                       | Collagen Type 16 Alpha 1 Chain            | 1.22E+07             | Matrisome-associated    | ECM Regulators    | CELA3A                             | Chymotrypsin Like Elastase Family Member 3A                    | 7.89E+05  |
| Core matrisome    | Collagens | COL4A4                                        | Collagen Type 4 Alpha 4 Chain             | 8.56E+05             | Matrisome-associated    | ECM Regulators    | PRSS2                              | Protease, Serine 2                                             | 3.99E+05  |
| Core matrisome    | Collagens | COL4A1                                        | Collagen Type 4 Alpha 1 Chain             | 2.90E+07             | Matrisome-associated    | ECM Regulators    | CELA2A                             | Chymotrypsin Like Elastase Family Member 2A                    | 8.69E+05  |
| Core matrisome    | Collagens | COL18A1                                       | Collagen Type 18 Alpha 1 Chain            | 1.66E+06             | Matrisome-associated    | ECM Regulators    | TGM2                               | Transglutaminase 2                                             | 9.74E+05  |
| Core matrisome    | Collagens | COL11A1                                       | Collagen Type 11 Alpha 1 Chain            | 6.30E+05             | Matrisome-associated    | ECM Regulators    | CELA3B                             | Chymotrypsin Like Elastase Family Member 3B                    | 2.78E+05  |
| Core matrisome    | Collagens | COL15A1                                       | Collagen Type 15 Alpha 1 Chain            | 1.26E+06             | Matrisome-associated    | ECM Regulators    | CTSD                               | Cathepsin D                                                    | 7.98E+05  |
| Core matrisome    | Collagens | COL8A1                                        | Collagen Type 8 Alpha 1 Chain             | 7.11E+06             | Matrisome-associated    | ECM Regulators    | CELA2B                             | Chymotrypsin Like Elastase Family Member 2B                    | 1.52E+05  |
| Core matrisome    | Collagens | COL6A6                                        | Collagen Type 6 Alpha 6 Chain             | 1.03E+06             | Matrisome-associated    | ECM Regulators    | AMBIP                              | Alpha-1-Microglobulin/Bikunin Precursor                        | 6.31E+05  |
| Core matrisome    | Collagens | COL28A1                                       | Collagen Type 28 Alpha 1 Chain            | 2.34E+06             | Matrisome-associated    | ECM Regulators    | SERPINB1                           | Serpin Family B Member 1                                       | 6.24E+05  |
| Core matrisome    | Collagens | COL4A5                                        | Collagen Type 4 Alpha 5 Chain             | 1.42E+05             | Matrisome-associated    | ECM Regulators    | SERPINA3                           | Serpin Family A Member 3                                       | 9.15E+04  |
| Core matrisome    | Collagens | COL4A3                                        | Collagen Type 4 Alpha 3 Chain             | 3.60E+05             | Matrisome-associated    | ECM Regulators    | SERPINA1                           | Serpin Family A Member 1                                       | 3.81E+05  |
| Core matrisome    | Collagens | COL21A1                                       | Collagen Type 21 Alpha 1 Chain            | 4.20E+06             | Matrisome-associated    | ECM Regulators    | SERPIN2                            | Serpin Family I Member 2                                       | 6.19E+05  |
| Core matrisome    | Collagens | COL12A2                                       | Collagen Type 12 Alpha 2 Chain            | 3.69E+05             | Matrisome-associated    | ECM Regulators    | CSTB                               | Cystatin B                                                     | 1.25E+05  |
| Core matrisome    | Collagens | COL12A1                                       | Collagen Type 12 Alpha 1 Chain            | 7.56E+05             | Matrisome-associated    | ECM Regulators    | CTS5                               | Cathepsin B                                                    | 3.34E+05  |
| Core matrisome    | Collagens | COL10A1                                       | Collagen Type 10 Alpha 1 Chain            | 4.20E+05             | Matrisome-associated    | ECM Regulators    | SERPINH1                           | Serpin Family H Member 1                                       | 1.05E+04  |
| Core matrisome    | Collagens | COL13A1                                       | Collagen Type 13 Alpha 1 Chain            | 5.28E+05             | Matrisome-associated    | ECM Regulators    | AZM                                | Alpha-2-Macroglobulin                                          | 3.57E+04  |
| Core matrisome    | Collagens | COL7A1                                        | Collagen Type 7 Alpha 1 Chain             | 1.01E+06             | Matrisome-associated    | ECM Regulators    | ITIH5                              | Inter- $\alpha$ -Trypsin Inhibitor Heavy Chain Family Member 5 | 5.27E+04  |
| Core matrisome    | Collagens | COL9A3                                        | Collagen Type 9 Alpha 3 Chain             | 6.77E+05             | Matrisome-associated    | ECM Regulators    | CST3                               | Cystatin C                                                     | 9.04E+04  |
| Core matrisome    | Collagens | COL8A2                                        | Collagen Type 8 Alpha 2 Chain             | 4.86E+05             | Matrisome-associated    | ECM Regulators    | SERPING1                           | Serpin Family G Member 1                                       | 1.67E+04  |
| ECM Glycoproteins | LAMA5     | Laminin Subunit Alpha 5                       | 1.61E+06                                  | Matrisome-associated | ECM Regulators          | RNG1              | Rhynogen 1                         | 2.71E+04                                                       |           |
| ECM Glycoproteins | LAMC1     | Laminin Subunit Gamma 1                       | 3.31E+06                                  | Matrisome-associated | ECM-affiliated Proteins | ANXA4             | Annexin A4                         | 7.93E+05                                                       |           |
| ECM Glycoproteins | LAMB1     | Laminin Subunit Beta 1                        | 1.93E+06                                  | Matrisome-associated | ECM-affiliated Proteins | ANXA6             | Annexin A6                         | 4.42E+05                                                       |           |
| ECM Glycoproteins | FBN1      | Fibrillin 1                                   | 3.35E+06                                  | Matrisome-associated | ECM-affiliated Proteins | ANXA2             | Annexin A2                         | 6.07E+05                                                       |           |
| ECM Glycoproteins | LAMA2     | Laminin Subunit Alpha 2                       | 2.20E+06                                  | Matrisome-associated | ECM-affiliated Proteins | REG1A             | Regenerating Family Member 1 Alpha | 1.11E+06                                                       |           |
| ECM Glycoproteins | LAMB2     | Laminin Subunit Beta 2                        | 9.19E+05                                  | Matrisome-associated | ECM-affiliated Proteins | ANXA1             | Annexin A1                         | 2.75E+05                                                       |           |
| ECM Glycoproteins | AGRN      | Agrin                                         | 1.10E+06                                  | Matrisome-associated | ECM-affiliated Proteins | REG1B             | Regenerating Family Member 1 Beta  | 1.79E+05                                                       |           |
| ECM Glycoproteins | NID2      | Nidogen 2                                     | 9.52E+05                                  | Matrisome-associated | ECM-affiliated Proteins | ANXA1             | Annexin A1                         | 2.75E+05                                                       |           |
| ECM Glycoproteins | NID1      | Nidogen 1                                     | 6.23E+05                                  | Matrisome-associated | ECM-affiliated Proteins | LGAL54            | Galectin 4                         | 4.07E+05                                                       |           |
| ECM Glycoproteins | FGA       | Fibrinogen Alpha Chain                        | 6.99E+05                                  | Matrisome-associated | ECM-affiliated Proteins | LGAL51            | Galectin 1                         | 8.23E+05                                                       |           |
| ECM Glycoproteins | TNFI      | Fibronectin 1                                 | 7.34E+05                                  | Matrisome-associated | ECM-affiliated Proteins | ANXA11            | Annexin A11                        | 2.71E+05                                                       |           |
| ECM Glycoproteins | TNAGL1    | Tubulointerstitial Nephritis Antigen Like 1   | 4.51E+05                                  | Matrisome-associated | ECM-affiliated Proteins | ANXA3             | Annexin A3                         | 9.49E+04                                                       |           |
| ECM Glycoproteins | FRAS1     | Fraser Extracellular Matrix Complex Subunit 1 | 1.49E+05                                  | Matrisome-associated | ECM-affiliated Proteins | LGAL52            | Galectin 2                         | 1.76E+05                                                       |           |
| ECM Glycoproteins | FGB       | Fibrinogen Beta Chain                         | 2.96E+05                                  | Matrisome-associated | ECM-affiliated Proteins | ANXA5             | Annexin A5                         | 1.08E+04                                                       |           |
| ECM Glycoproteins | FGG       | Fibrinogen Gamma Chain                        | 3.31E+05                                  | Matrisome-associated | ECM-affiliated Proteins | ANXA7             | Annexin A7                         | 1.63E+04                                                       |           |
| ECM Glycoproteins | VTN       | Vitronectin                                   | 2.98E+05                                  | Matrisome-associated | ECM-affiliated Proteins | LGAL58            | Galectin 8                         | 3.44E+04                                                       |           |
| ECM Glycoproteins | LAMA4     | Laminin Subunit Alpha 4                       | 3.71E+05                                  | Matrisome-associated | ECM-affiliated Proteins | LGAL53            | Galectin 3                         | 6.71E+03                                                       |           |
| ECM Glycoproteins | MFG8      | Milk Fat Globule-EGF Factor 8 Protein         | 1.98E+05                                  | Matrisome-associated | ECM-affiliated Proteins | REG3A             | Regenerating Family Member 3 Alpha | 7.89E+04                                                       |           |
| ECM Glycoproteins | DPT       | Dermatopontin                                 | 1.21E+06                                  | Matrisome-associated | ECM-affiliated Proteins | CIQTNF2           | C1q And TNF Related 2              | 6.60E+04                                                       |           |
| ECM Glycoproteins | EMILIN1   | Elastin Microfibril Interfacier 1             | 1.54E+05                                  | Matrisome-associated | ECM-affiliated Proteins | CIQTNF5           | C1q And TNF Related 5              | 2.33E+05                                                       |           |
| ECM Glycoproteins | LAMC3     | Laminin Subunit Gamma 3                       | 2.81E+05                                  | Matrisome-associated | ECM-affiliated Proteins | HPX               | Hemopexin                          | 4.07E+04                                                       |           |
| ECM Glycoproteins | TNXC      | Tenascin XB                                   | 1.44E+05                                  | Matrisome-associated | Secreted Factors        | S100A13           | S100 Calcium Binding Protein A13   | 8.68E+04                                                       |           |
| ECM Glycoproteins | POSTN     | Periostin                                     | 8.03E+04                                  | Matrisome-associated | Secreted Factors        | HRNR              | Hornerin                           | 1.79E+04                                                       |           |
| ECM Glycoproteins | TGFB1     | Transforming Growth Factor Beta Induced       | 1.24E+05                                  | Matrisome-associated | Secreted Factors        | S100A10           | S100 Calcium Binding Protein A10   | 2.41E+04                                                       |           |
| ECM Glycoproteins | IGFBP7    | Insulin Like Growth Factor Binding Protein 7  | 1.86E+05                                  | Matrisome-associated | Secreted Factors        | S100A11           | S100 Calcium Binding Protein A11   | 8.73E+03                                                       |           |
| ECM Glycoproteins | VWASA     | Von Willebrand Factor A Domain Containing 5A  | 5.47E+04                                  | Matrisome-associated | Secreted Factors        | CFC1B             | CFC1B                              | 2.33E+04                                                       |           |
| ECM Glycoproteins | THBS1     | Thrombospondin 1                              | 2.95E+04                                  | Matrisome-associated | Secreted Factors        | HCFC1             | Host Cell Factor C1                | 5.72E+04                                                       |           |

**Fig. S4:** Full list of all 120 matrisome and matrisome-associated proteins identified in the decellularized hP-ECM. Proteins were classified using the MatrixDB database.

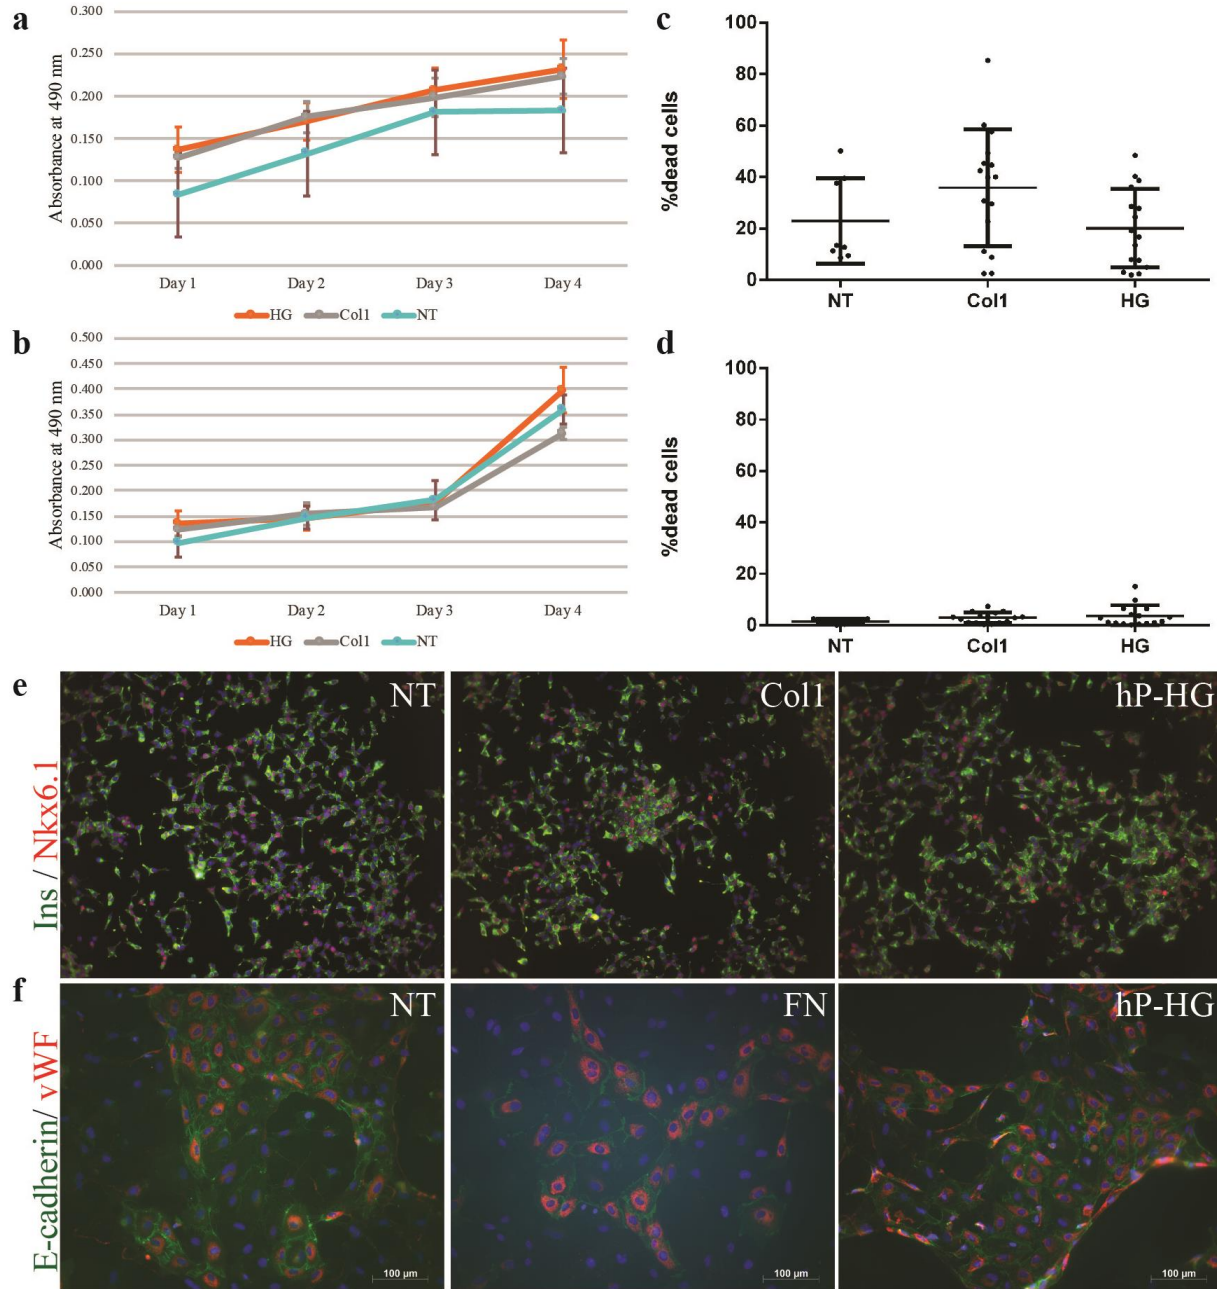

**Fig. S5:** *In vitro* cytocompatibility evaluation of hP-HG using HUVECs and INS-1 832/13 cells. Cells were cultured for 4 days on either tissue culture plastic (NT, not treated), collagen I (Col 1), or human pancreatic ECM hydrogel (hP-HG). Cells were analysed daily using the MTS assay, at the end of the culture period by live:dead staining protocol and by specific marker staining. **a**) HUVEC MTS growth curve. **b**) INS-1 832/13 cells MTS growth curve. **c** and **d**) % dead cells quantified at day 4 of culture for HUVECs and INS-1 832/13 cells, respectively. **e**) Insulin (green) and Nkx6.1 (red) staining of INS-1 832/13 cells cultured under the 3 different conditions at day 4 of culture. **f**) E-cadherin (green) and von Willebrands Factor (vWF, red) staining of HUVECS cultured under the 3 different conditions at day 4 of culture.

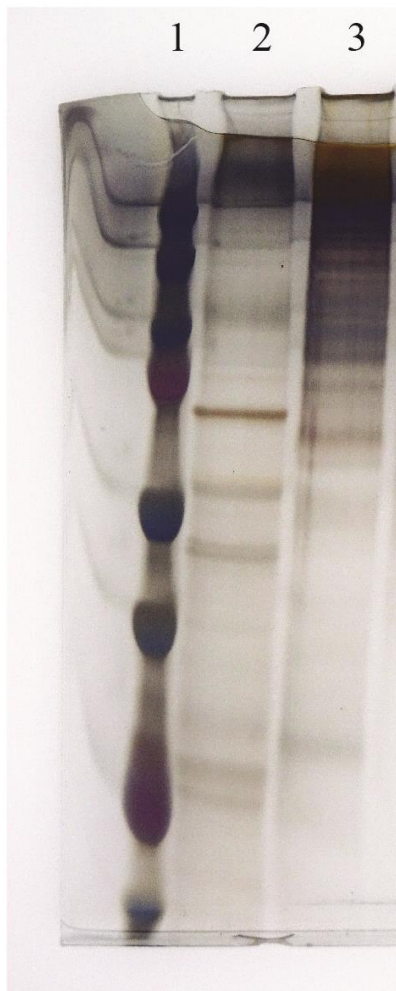

**Fig. S6:** Full length image of the SDS-PAGE gel shown in Figure 6. Lane 1 is loaded with the Precision Plus Protein Dual Color Standard. Lane 2 is loaded with 10  $\mu\text{g}$  of the native pancreas from the same donor as Lane 3, loaded with 10  $\mu\text{g}$  of decellularized pancreatic ECM. The remaining lanes of the gel contained samples unrelated to this project. The image shown in Figure 6a was cropped slightly to remove the edges of the gel, and rotated slightly to straighten the lanes.



## Supplementary Methods.

### ***Pancreata Procurement.***

Pancreata are deemed unsuitable for transplantation for some of the following reasons: vascular damage or anomaly, high BMI, or duodenal injury or anomaly after visual inspection. Organs were selected from donors with no history or evidence of pancreatitis, diabetes, pancreatic cancer, hepatitis or HIV infection and were from donation after circulatory death (DCD) or donation after brain death (DBD). Organs were recovered after *in situ* flush with UW Solution [ViaSpan® (TEVA Pharmaceuticals USA, Inc., North Wales, Pennsylvania), SPS-1, (Organ Recovery Systems, Inc. Itasca, Illinois), or UW Belzer® Cold Storage Solution (Bridge to Life, Ltd. Columbia, South Carolina)], and stored in the same solution at 4°C until tissues were processed within 24 hours of recovery. No organs/tissue were procured from prisoners.

### ***Modified Folch Method***

30 mg of lyophilized ECM was weighed; 2 ml of 1:3 (v:v) chloroform:methanol solution was added to each sample. Samples were incubated for 30 minutes shaking at RT, centrifuged (4300 rpm, 5 min), and the supernatant was decanted into a new tube. 800 µl of water and 2.5 ml of chloroform was added to the supernatant, and tubes were vigorously shaken. Samples were centrifuged (2200 rpm, 5 min) and the upper phase was removed. The lower phase was allowed to air dry in a fume hood for 4-7 days until dry; the resulting lipid material was weighed to determine lipid content of the original sample.

### ***Hydrogel Formation.***

Pepsin was used at a ratio of 0.1 mg pepsin per 1 mg ECM and solubilized in 0.01 M HCl prior to being added to the ECM. The digestion was prepared such that the final gel would have a density of 8 mg ECM/ml gel. This required a volume of 818 µl of 0.01 M HCl per 1 mg of lyophilized ECM. ECM was digested for 72-96 hours at RT until the solution was transparent and free of undigested pieces. If a significant amount of undigested matrix was still present after 48 hours of digestion, the solution was homogenized and digested for another 48 hours at RT. Neutralization of the acidic digest solution was achieved by mixing ice cold 0.1 M NaOH (equal to 1/10 the volume of acidic digest) and 10X PBS (equal to 1/9 the total volume of digest + NaOH used) and adding this mixed solution to the digested ECM at 4°C. Mixed pre-gel solution is then placed at 37°C for 30 minutes for gelation to occur. If not used immediately, the gel was lyophilized and stored at -80°C.

### ***Generation of Humanized Mice.***

Research involving mice was performed in accordance with a protocol that was approved by the University of Wisconsin School of Medicine and Public Health Animal Care and Use Committee, and in accordance with a protocol approved by the University of Wisconsin Institutional Review Board. Humanized mice were generated similarly to previously published reports<sup>65-67</sup>. Briefly, NOD-*scid* *IL2r $\gamma$ <sup>null</sup>* (NSG) mice aged 7–8 weeks, obtained from Jackson Laboratories (stock #005557), were conditioned with sublethal total body irradiation with 250 RAD via an X-RAD 320ix irradiator (Precision X-Ray, North Branford, CT) and within 4 hours transplanted with 1mm<sup>3</sup> human foetal thymus fragments (14-20 weeks gestation and obtained from Advanced Bioscience Resource (Alameda, CA)) into the kidney subcapsular space. Immediately following surgery, mice were intravenously injected with 40,000 purified CD34+ cells, which were isolated from autologous liver tissue. The CD34+ cells were isolated via magnetically activated cell sorter (MACS) separation system (Miltenyi Biotec, Auburn, CA). Mice were monitored for engraftment of human white blood cells (hCD45+) at 8 and 12 weeks and are considered

Sackett and Tremmel et al.

successfully humanized with presence of greater than 25% hCD45+ cells. Further details are available in supplementary materials.

***Proteomics analysis.***

The OMSSA proteomic Analysis Software Suite (COMPASS) was used for peptide identification and searched against Homo sapiens Uniprot database. Trypsin was selected as the enzyme and maximum of two missed cleavages were allowed. Precursor and fragment ion tolerance was set to 25 ppm and 0.02 Da. DiLeu labelling on N-termini, lysine residue (+145.1267748 Da), and carbamidomethylation of cysteine residues (+57.02146 Da) were chosen as static modifications. Variable modifications included methionine oxidation (+15.99492 Da) and DiLeu labeling on tyrosine residue (+145.1267748). Results were filtered at 1% false discovery rate (FDR) for both peptide and protein.
